# Supplementary material for: Eco-Friendly Extraction, Structure, and Gel Properties of ι-Carrageenan Extracted Using Ca(OH)2
Source: MDPI journal article supplement (doi:10.3390/md20070419), 2022-06-27
Supplement: s1 [file s1]

# Eco-Friendly Extraction, Structure, and Gel Properties of $\iota$ -Carrageenan Extracted Using $\text{Ca}(\text{OH})_2$

Feng Jiang<sup>1,2,3,+,</sup> Yao Liu<sup>1,2,3,+,</sup> Qiong Xiao<sup>1,2,3,4,</sup> Fuquan Chen<sup>1,2,3,4,</sup> Huifen Weng<sup>1,2,3,4,</sup> Jun Chen<sup>1,2,3,4,</sup> Yonghui Zhang<sup>1,2,3,4,\*</sup>, Anfeng Xiao<sup>1,2,3,4,\*</sup>

- <sup>1</sup> College of Food and Biological Engineering, Jimei University, Xiamen 361021, PR China; 202011832019@jmu.edu.cn (F.J.); liuyao0902@foxmail.com (Y.L.); xiaoqiong129@jmu.edu.cn (Q.X.); fqchenhy0109@jmu.edu.cn (F.-Q.C.); wenghuifen@jmu.edu.cn (H.-F.W.); chenjun@jmu.edu.cn (J.C.);
- <sup>2</sup> National R&D Center for Red Alga Processing Technology, Xiamen 361021, PR China
- <sup>3</sup> Fujian Provincial Engineering Technology Research Center of Marine Functional Food, Xiamen 361021, PR China
- <sup>4</sup> Xiamen Key Laboratory of Marine Functional Food, Xiamen 361021, China
- <sup>+</sup> These authors contributed equally to this paper
- <sup>\*</sup> Correspondence: yhz@jmu.edu.cn (Y.-H.Z.); xxaaffeng@jmu.edu.cn (A.-F.X.); Tel.: +86-592-6181487 (Y.-H.Z.); +86-592-6180075 (A.-F.X.).

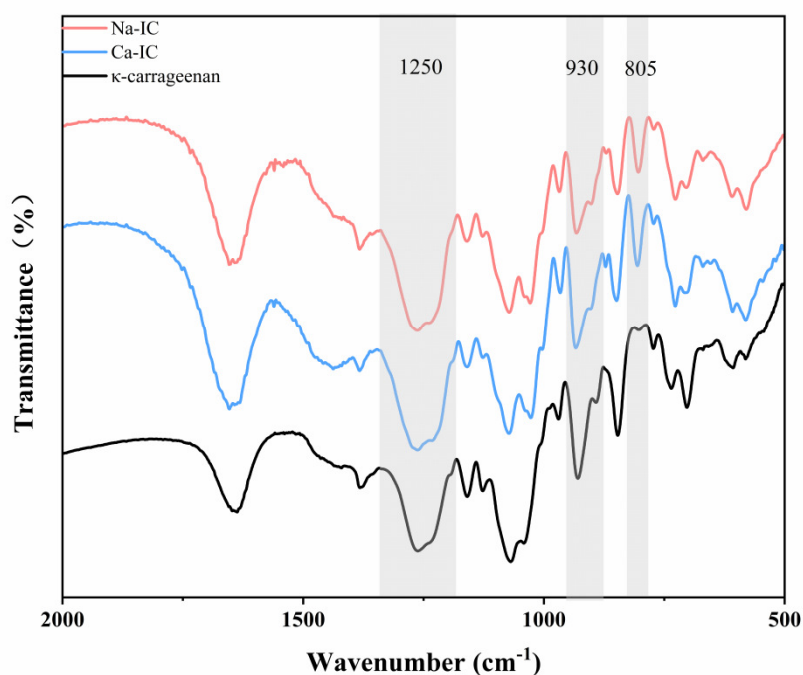

**Figure S1.** FTIR spectra (500-2000  $\text{cm}^{-1}$ ).

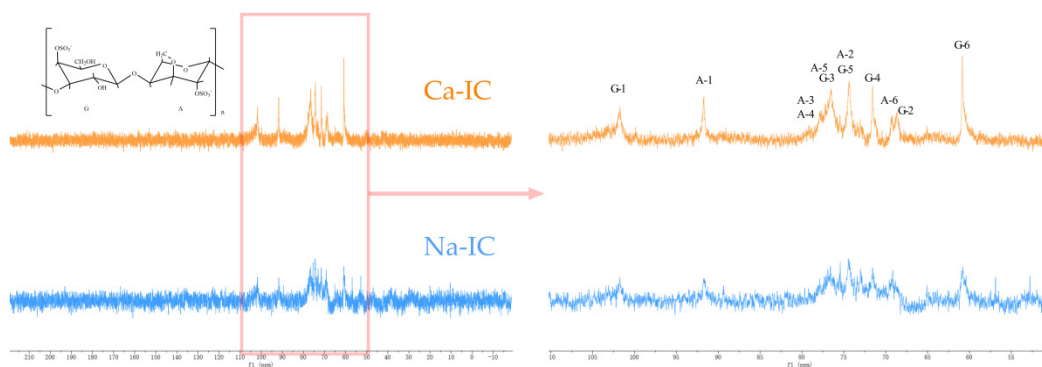

**Figure S2.** Carbon-13 NMR spectrum of Ca-IC and Na-IC. (G and A denote galactose and 3,6-anhydro-galactose, respectively [1, 2])

## References

- [1] Usov, A.; Shashkov, A., Polysaccharides of algae. XXXIV: Detection of iota-carrageenan in *Phyllophora brodiaei* (Turn.) J. Ag.(Rhodophyta) using <sup>13</sup>C-NMR spectroscopy. **1985**.
- [2] van de Velde, F.; Knutsen, S. H.; Usov, A. I.; Rollema, H. S.; Cerezo, A. S., <sup>1</sup>H and <sup>13</sup>C high resolution NMR spectroscopy of carrageenans: application in research and industry. *Trends in Food Science & Technology* **2002**, 13, (3), 73-92.
